# Supplementary material
Source: Springer Nature journal article supplement (https://www.springermedizin.de/resource/supplementary/12911_2011_549_MOESM5_ESM.pdf/9526120)
Supplement: MOESM5 [file 9526120]

Input free text  
(e.g. GP history  
or physical exam,  
scanned clinic  
letters, discharge  
summaries)

Identify dates, numbers  
and words which may  
be part of clinical terms.  
Attempt to correct  
spelling mistakes

Search for word patterns  
to assign attributes

Extend attributes (e.g. negation)  
to a sequence of words, guided by  
punctuation and stop words (e.g. 'but')

Attempt to match  
sequences of words  
to Read terms

Output structured data

## Example analysis

Fracture of right femur in Jul 2010

fracture (WORD)  
of (IGNORE)  
right (WORD)  
femur (WORD)  
in (IGNORE)  
jul 2010 (DATE: July 2010)

Pattern matching:  
'... in (DATE)' maps to '... in jul 2010'  
means that the date refers to the  
preceding diagnosis

Matching to Read/OXMIS term

'fracture of right femur' maps to 'fracture femur'  
(OXMIS term 8210 'FRACTURE FEMUR')

'of' is ignored

'right' is ignored as long as there is no 'left' in the Read term

1. OXMIS 8210 FRACTURE FEMUR
2. Date of preceding diagnosis: July 2010
